# Supplementary material for: Is Li4Ti5O12a solid-electrolyte-interphase-free electrode material in Li-ion batteries? Reactivity between the Li4Ti5O12electrode and electrolyte
Source: Royal Society of Chemistry journal article supplement (doi:10.1039/c3ta12728a), 2013-10-30
Supplement: c3ta12728a.pdf [file c3ta12728a.pdf]

## Supporting Information

### **Is $\text{Li}_4\text{Ti}_5\text{O}_{12}$ a solid-electrolyte-interphase-free electrode material in Li-ion batteries? Reactivity between $\text{Li}_4\text{Ti}_5\text{O}_{12}$ electrode and electrolyte**

**Min-Sang Song,<sup>a</sup> Ryoung-Hee Kim,<sup>a</sup> Seung-Wook Baek,<sup>a</sup> Kug-Seung Lee,<sup>b</sup>  
Kyusung Park<sup>\*c</sup> and Anass Benayad<sup>\*d</sup>**

<sup>a</sup> Energy Storage Group, Samsung Advanced Institute of Technology (SAIT), San 14, Yongin 446-712, South Korea.

<sup>b</sup> Pohang Accelerator Laboratory, Pohang 790-784, South Korea.

<sup>c</sup> Texas Materials Institute, The University of Texas at Austin, Austin, Texas 78712, United States. E-mail: kspark37@gmail.com

<sup>d</sup> Analytical Sciences Group, SAIT, San 14, Yongin 446-712, South Korea. E-mail: an\_be2001@yahoo.fr

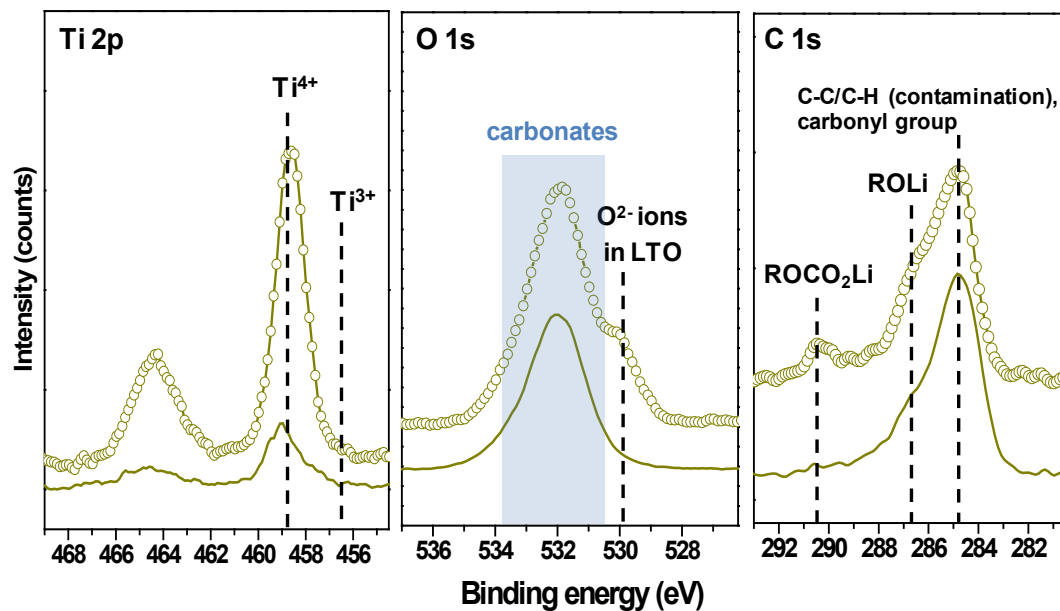

**Fig. S1** Ti 2p, O 1s and C 1s XPS spectra of the carbon-free  $\text{Li}_4\text{Ti}_5\text{O}_{12}$  electrode after 50 cycles: before and after mechanical scratching corresponding to solid and empty circles, respectively.

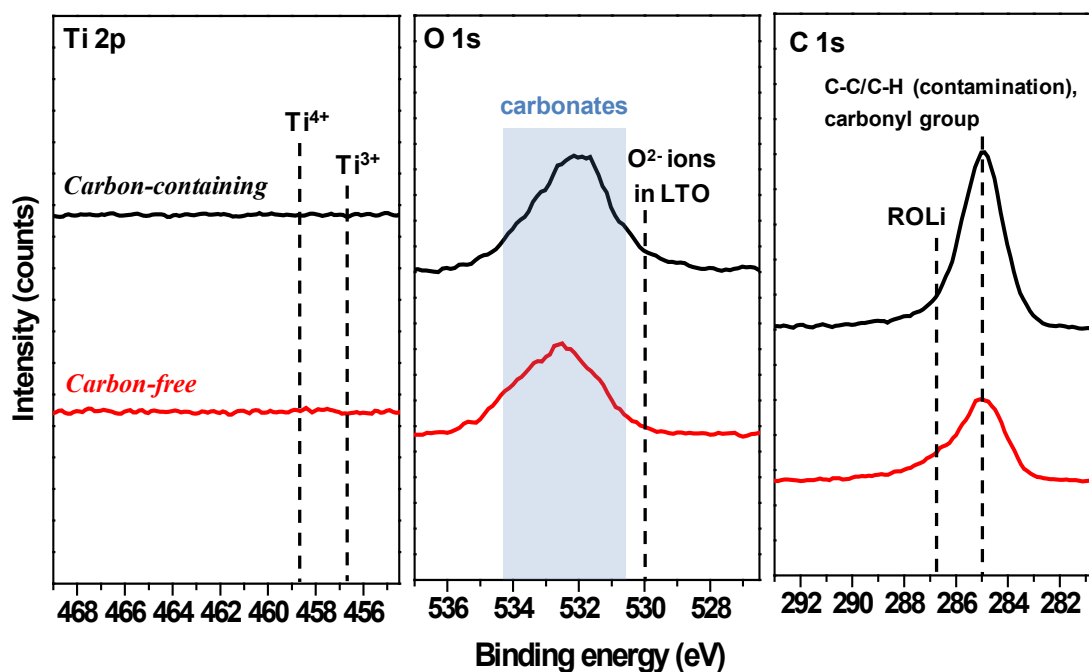

**Fig. S2** Ti 2p, O 1s and C 1s XPS spectra of the carbon-free  $Li_4Ti_5O_{12}$  electrode (red) and the carbon-containing electrode (black) after 280 cycles at 60°C.

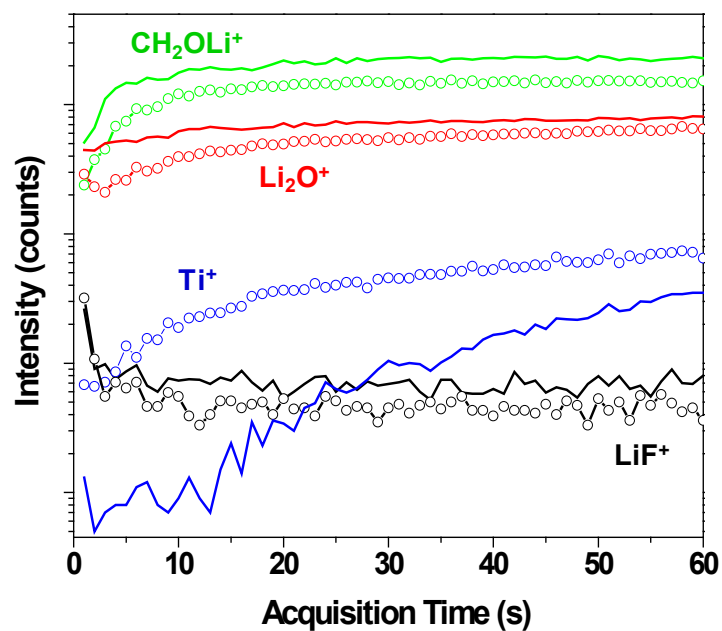

**Fig. S3** SIMS depth profiles of  $\text{Li}_4\text{Ti}_5\text{O}_{12}$  electrodes after 280 cycles at  $60^\circ\text{C}$ . Empty circles correspond to the carbon-free electrode and solid line for the carbon-containing electrode.

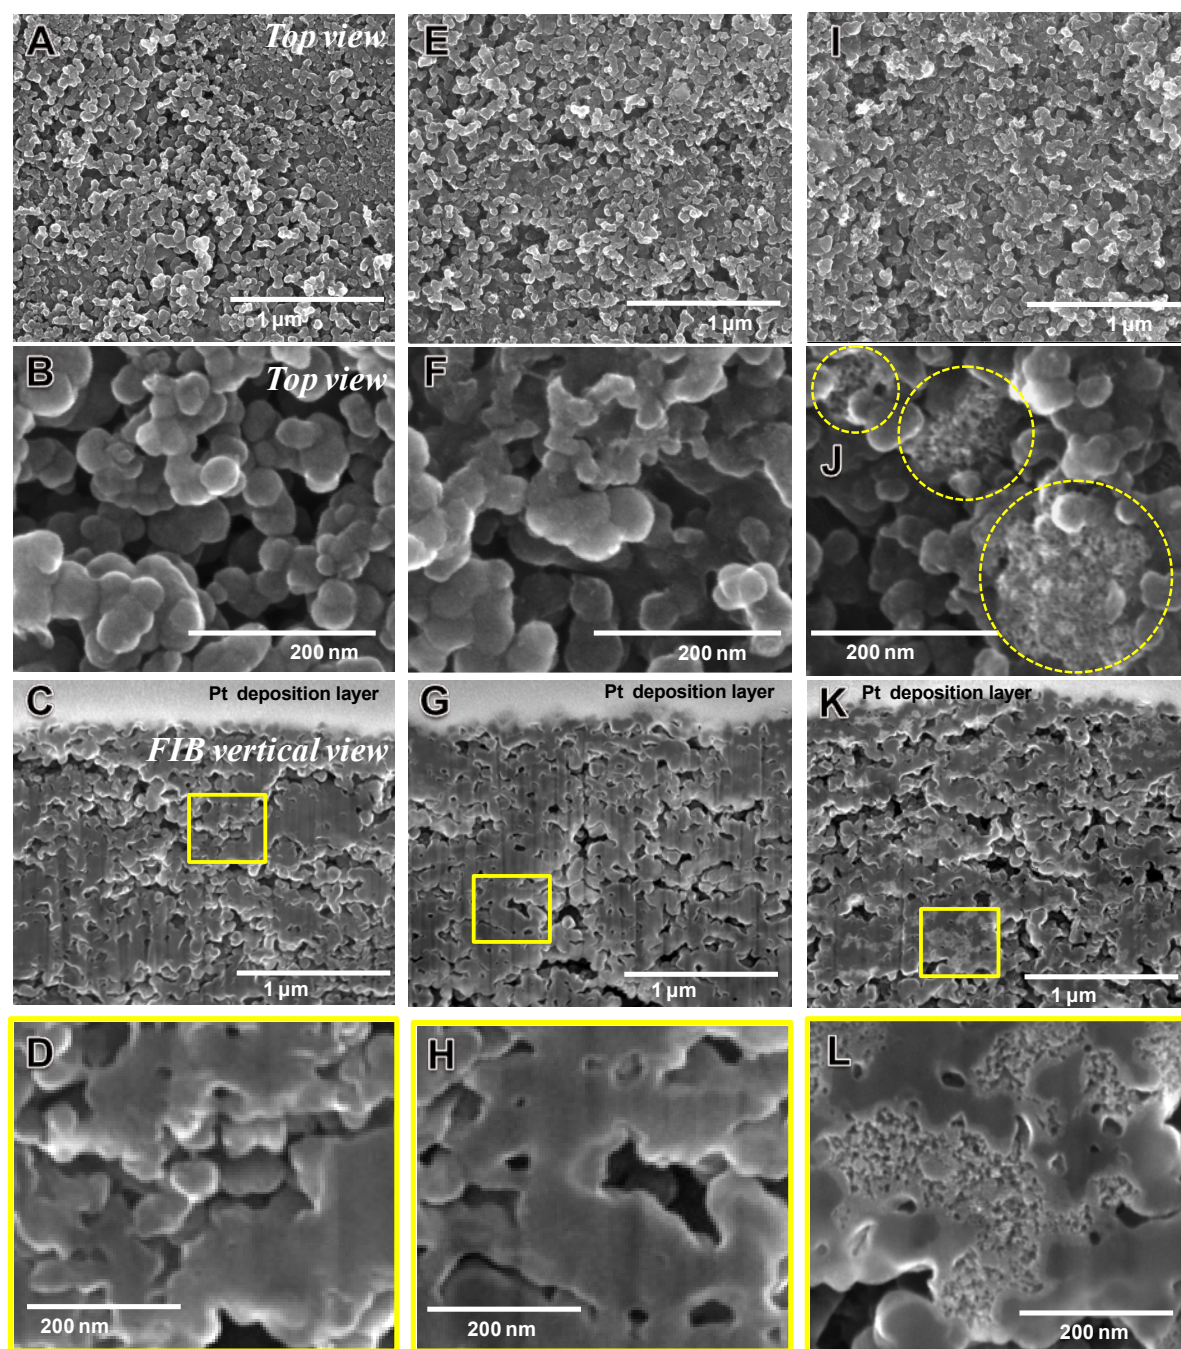

**Fig. S4** SEM (top-view) and FIB cross-section images of the carbon electrodes without  $\text{Li}_4\text{Ti}_5\text{O}_{12}$  (A-D) before and after the 1.55 V potentiostatic aging at (E-H) room and (I-L) high temperature.

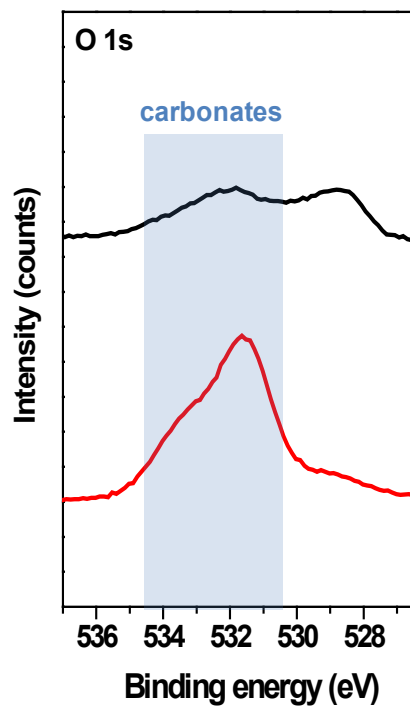

**Fig. S5** O 1s XPS spectra of the carbon electrodes without  $\text{Li}_4\text{Ti}_5\text{O}_{12}$  after 1.55 V potentiostatic aging at room (black line) and high (red line) temperature.
